# Supplementary material for: Chemical composition and bioactive properties of Sanguisorba minor Scop. under Mediterranean growing conditions
Source: Royal Society of Chemistry journal article supplement (doi:10.1039/c8fo02601g), 2019-01-01
Supplement: c8fo02601g1.pdf [file c8fo02601g1.pdf]

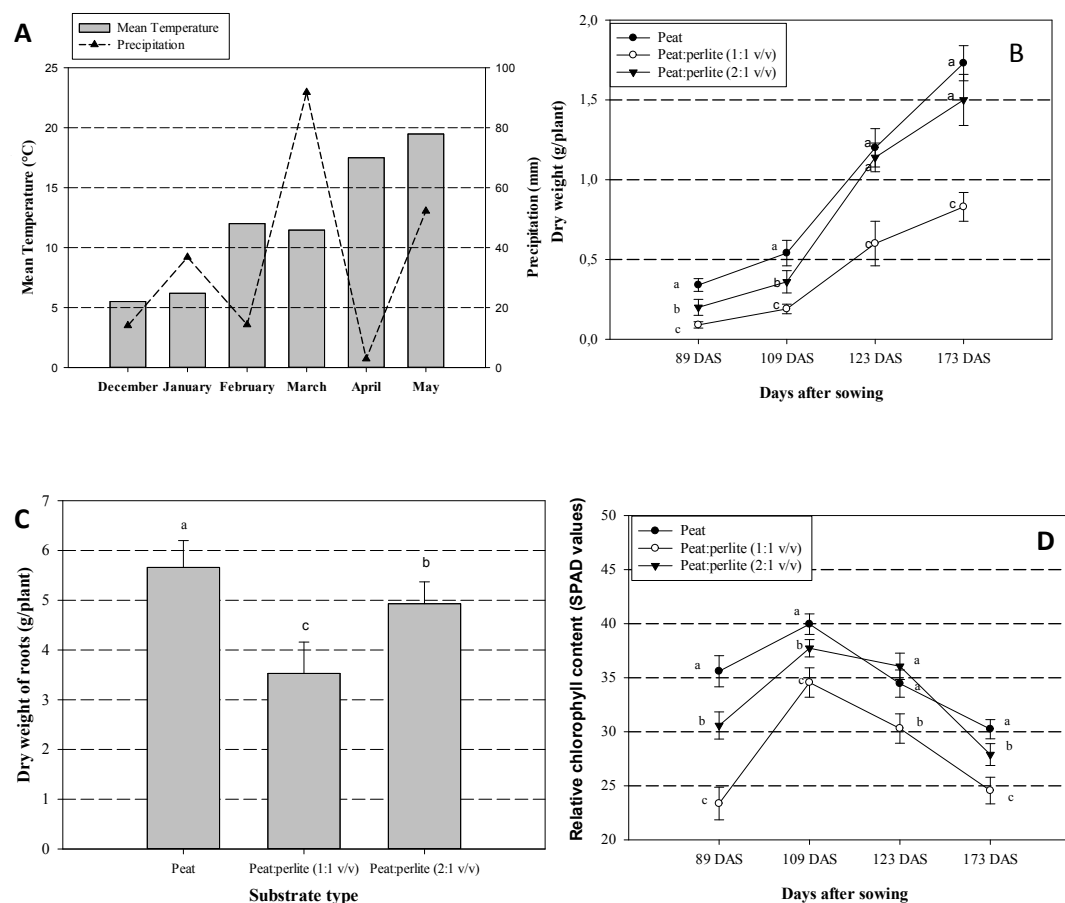

**Figure S1.** A) Monthly precipitation (mm) and mean temperature (°C) during the experimental period (December 2015 to May 2016); B) Dry weight of the aerial plant part (g/plant) of *Sanguisorba minor* in relation to substrate type; C) Dry weight of roots (g/plant) of *Sanguisorba minor* in relation to substrate type; D) Relative chlorophyll content (SPAD values) in leaves of *Sanguisorba minor* in relation to substrate type. Error bars indicate standard deviation of the means. Small letters indicate significant differences between means according to Tukey's HSD test ( $P < 0.05$ ).

\*DAS: Days after sowing
